# Supplementary material for: Multiple-stimuli-responsive multicolor luminescent self-healing hydrogel and application in information encryption and bioinspired camouflage
Source: Royal Society of Chemistry journal article supplement (doi:10.1039/d2tc03072a), 2022-01-01
Supplement: d2tc03072a1.pdf [file d2tc03072a1.pdf]

## Electronic Supplementary Information

# **Multiple Stimuli-Responsive Multicolor Luminescent Self-Healing Hydrogel and Application in Information Encryption and Bioinspired Camouflage**

Jing Wang,<sup>a</sup> Man Zhang,<sup>\*b</sup> Shilei Han,<sup>a</sup> Liangliang Zhu<sup>b</sup>, Xiaoyong Jia<sup>\*a</sup>

<sup>a</sup> Henan Key Laboratory of Photovoltaic Materials, Henan University, Kaifeng 475004, China. E-mail: [jiaxiaoyong@henu.edu.cn](mailto:jiaxiaoyong@henu.edu.cn)

<sup>b</sup> State Key Laboratory of Molecular Engineering of Polymers, Department of Macromolecular Science, Fudan University, Shanghai 200433, China. E-mail: [zhangman6455@163.com](mailto:zhangman6455@163.com)

---

## Table of Content

|                                                                                                                           |   |
|---------------------------------------------------------------------------------------------------------------------------|---|
| <b>Figure S1.</b> The emission and Uv-vis spectra of HCPB under different irradiation time                                | 3 |
| <b>Figure S2.</b> The emission and Uv-vis spectra of HCPB in solution with addition of HCl                                | 3 |
| <b>Figure S3.</b> The emission and Uv-vis spectra of HCPB in solution with addition of $\text{EuCl}_3$                    | 3 |
| <b>Figure S4.</b> TEM images before and after different stimuli                                                           | 4 |
| <b>Figure S5.</b> DLS data before and after different stimuli                                                             | 4 |
| <b>Figure S6.</b> Illustration the formation of aggregates under UV irradiation                                           | 4 |
| <b>Figure S7.</b> Illustration the formation of aggregates under different stimuli                                        | 5 |
| <b>Figure S8.</b> The emission spectra of HCPB in aqueous solution under different stimuli                                | 5 |
| <b>Figure S9.</b> The emission spectra of HCPB in aqueous solution after different metal ions added                       | 5 |
| <b>Figure S10.</b> PVA-HCPB hydrogel under different irradiation time                                                     | 6 |
| <b>Figure S11.</b> PVA-HCPB-UV hydrogel in dark for different time                                                        | 6 |
| <b>Figure S12.</b> The emission spectra of luminescent hydrogel after treated with $\text{NH}_3 \cdot \text{H}_2\text{O}$ | 7 |
| <b>Figure S13.</b> Stress–strain curves of PVA-HCPB with different amount of HCPB                                         | 7 |
| <b>Figure S14.</b> The emission spectra of PVA-HCPB with different amount of HCPB after UV                                | 7 |
| <b>Figure S15.</b> UV–vis spectra of PVA-HCPB with different amount of HCPB                                               | 8 |
| <b>Figure S16.</b> The emission spectra of PVA-HCPB -UV hydrogel under different stimuli                                  | 8 |
| <b>Figure S17.</b> TEM images of different hydrogel before and after self-healing                                         | 8 |
| <b>Figure S18.</b> Chameleon-shaped hydrogel switches luminescence under different stimuli                                | 9 |

## 2. Additional Data

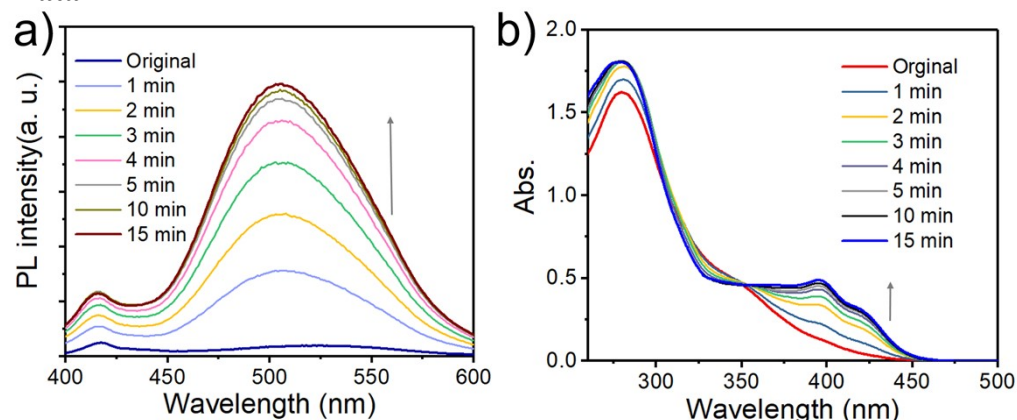

**Figure S1** a) The emission spectra and b) Uv-vis absorption spectra of HCPB in aqueous solution under different UV irradiation time . These measurements were performed at 300 K with the concentration of HCPB  $0.5 \times 10^{-4}$  M.

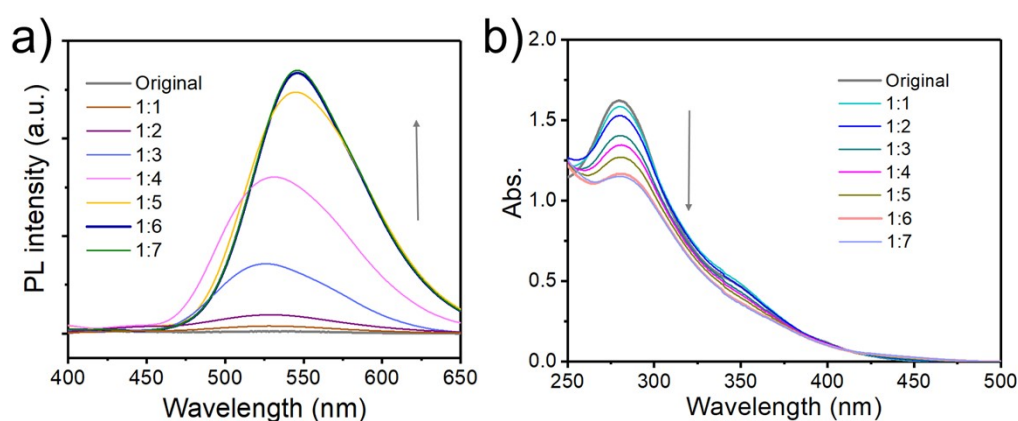

**Figure S2** a) The emission spectra and b) Uv-vis absorption spectra of HCPB in aqueous solution with addition of HCl (the molar ratio of HCPB and H<sup>+</sup> changed from 1:1 to 1:7). These measurements were performed at 300 K with the concentration of HCPB  $0.5 \times 10^{-4}$  M,

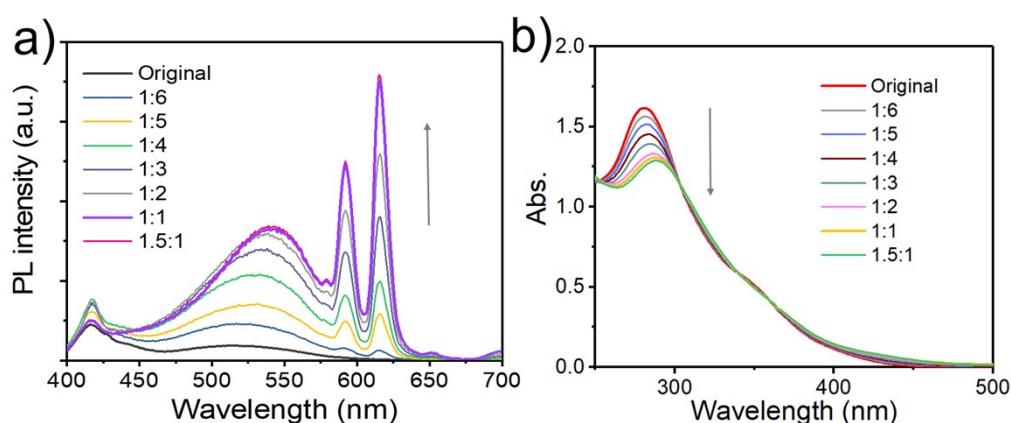

**Figure S3** a) The emission spectra and b) Uv-vis absorption spectra of of HCPB in aqueous solution with addition of EuCl<sub>3</sub> gradually (the molar ratio of Eu<sup>3+</sup> and HCPB changed from 1:6 to 1.5:1). These measurements were performed at room temperature 300 K with the concentration of HCPB  $0.5 \times 10^{-4}$  M.

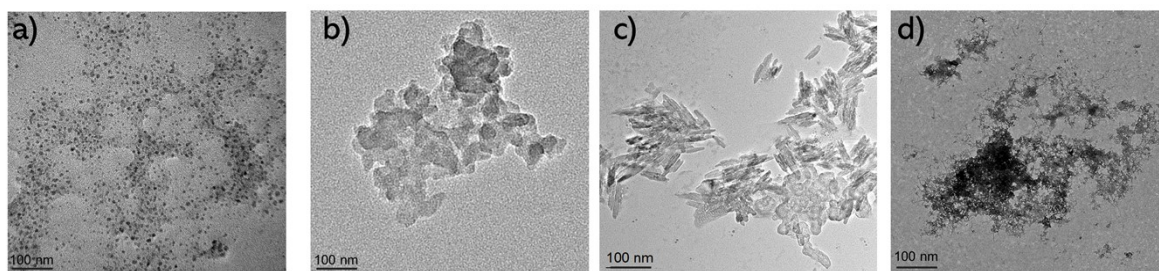

**Figure S4** TEM images before and after different stimuli. a) prepared from solution without any stimuli, b) prepared from solution after UV irradiation for 5 min c) prepared from solution after  $H^+$  added, the molar ratio of HCPB and  $H^+$  was 1:6. d) prepared from solution after  $Eu^{3+}$  added, the molar ratio of HCPB and  $Eu^{3+}$  was 1:1.

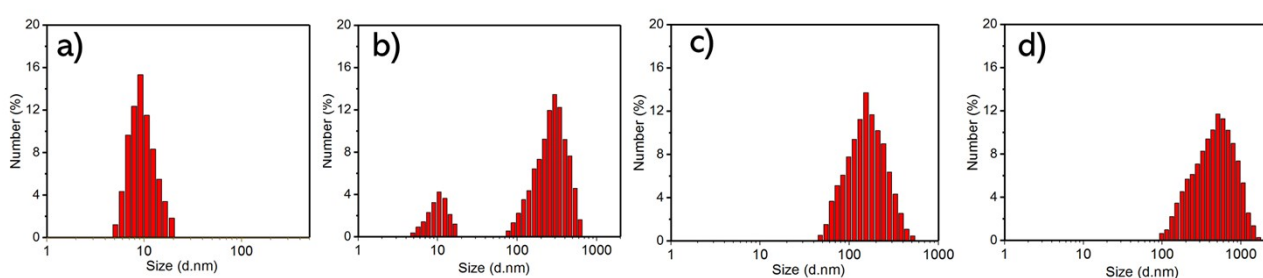

**Figure S5** DLS data before and after different stimuli. a) solution without any stimuli, b) solution after UV irradiation for 5 min. c) solution after  $H^+$  added, the molar ratio of HCPB and  $H^+$  was 1:6. d) solution after  $Eu^{3+}$  added, the molar ratio of HCPB and  $Eu^{3+}$  was 1:1.

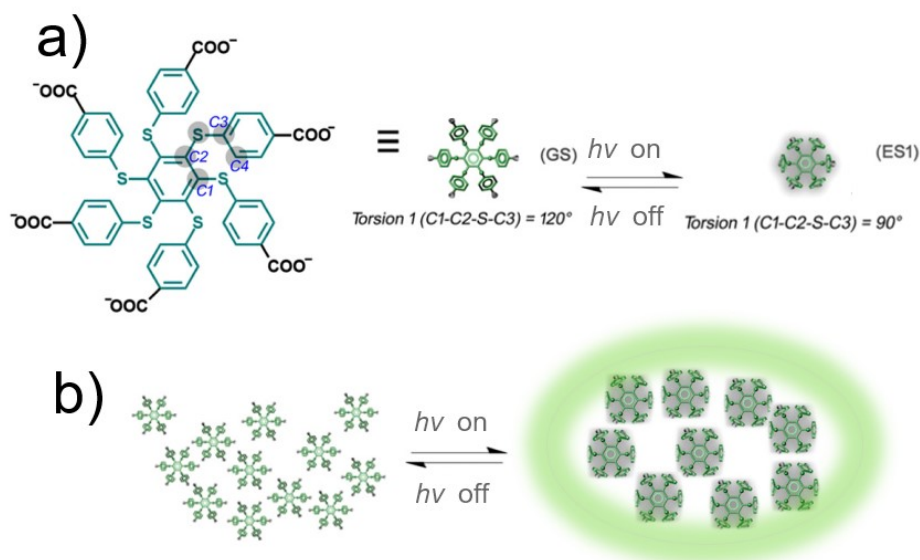

**Figure S6** Illustration the formation of aggregates under UV irradiation. a) Schematic illustration of the Chemical structure under UV, b) photoexcitation-controlled aggregation process.

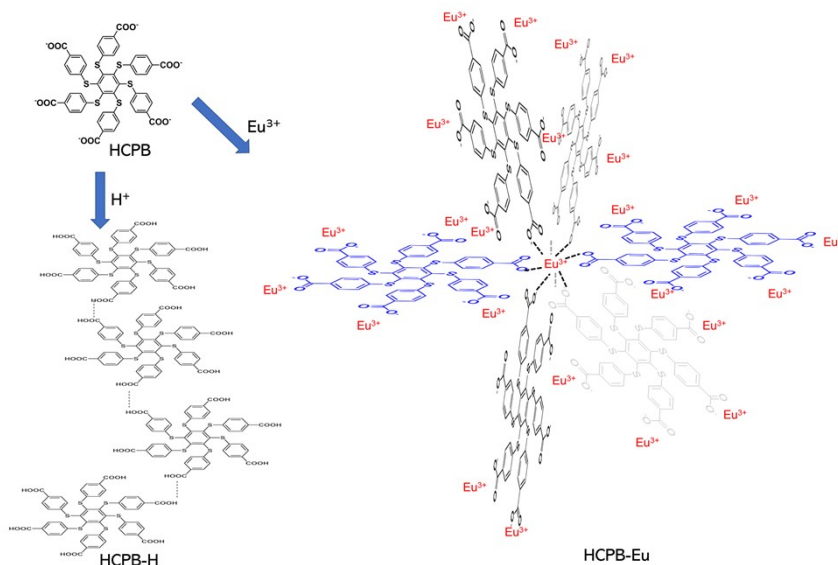

**Figure S7** Illustration the formation of aggregates under different stimuli.

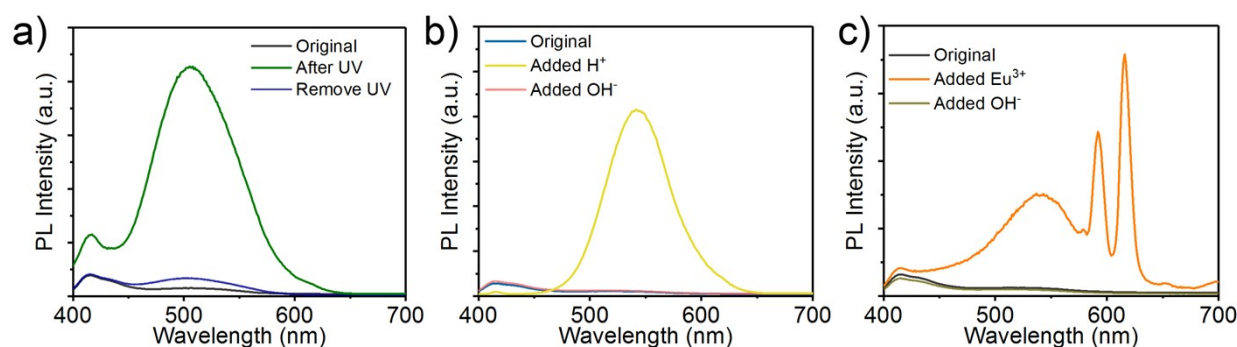

**Figure S8** The emission spectra of HCPB in aqueous solution under different stimuli. a) After UV irradiation for 5 min and relax in dark for 1 h, b) After addition 6  $\mu$  L of HCl (0.5 M) and 6  $\mu$  L  $\text{NH}_3 \cdot \text{H}_2\text{O}$  (0.5 M), c) After addition 10  $\mu$  L of  $\text{EuCl}_3$  (0.05 M) and 1  $\mu$  L  $\text{NH}_3 \cdot \text{H}_2\text{O}$  (0.5 M). These measurements were performed at 300 K with the concentration of HCPB  $0.5 \times 10^{-4}$  M.

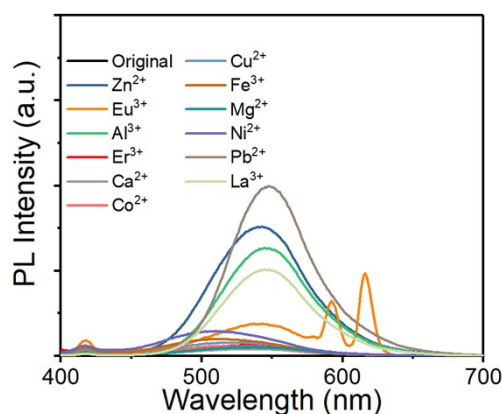

**Figure S9** The emission spectra of HCPB in aqueous solution after different metal ions added. These measurements were performed at 300 K with the concentration of HCPB  $0.5 \times 10^{-4}$  M. The molar ratio of HCPB and metal ion was fixed at 1:1.

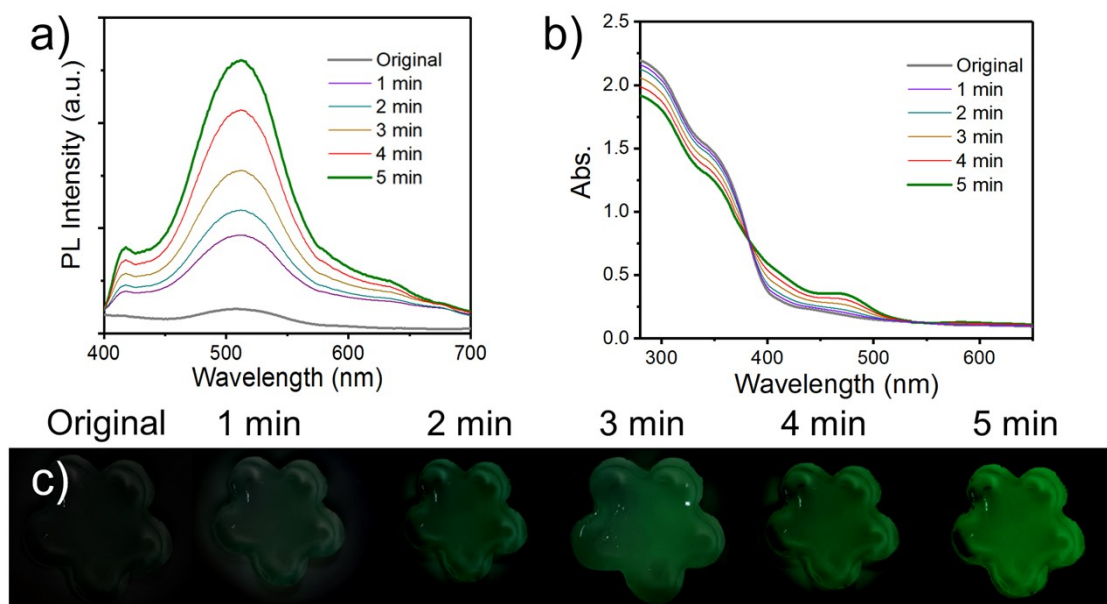

**Figure S10** PVA-HCPB hydrogel under different irradiation time. a) Emission spectra of PVA-HCPB under different UV irradiation time, b) Uv-vis absorption spectra of PVA-HCPB under different UV irradiation time, c) Image of PVA-HCPB different UV irradiation time. These measurements were performed at 300 K with the amount of HCPB 0.8 mg.

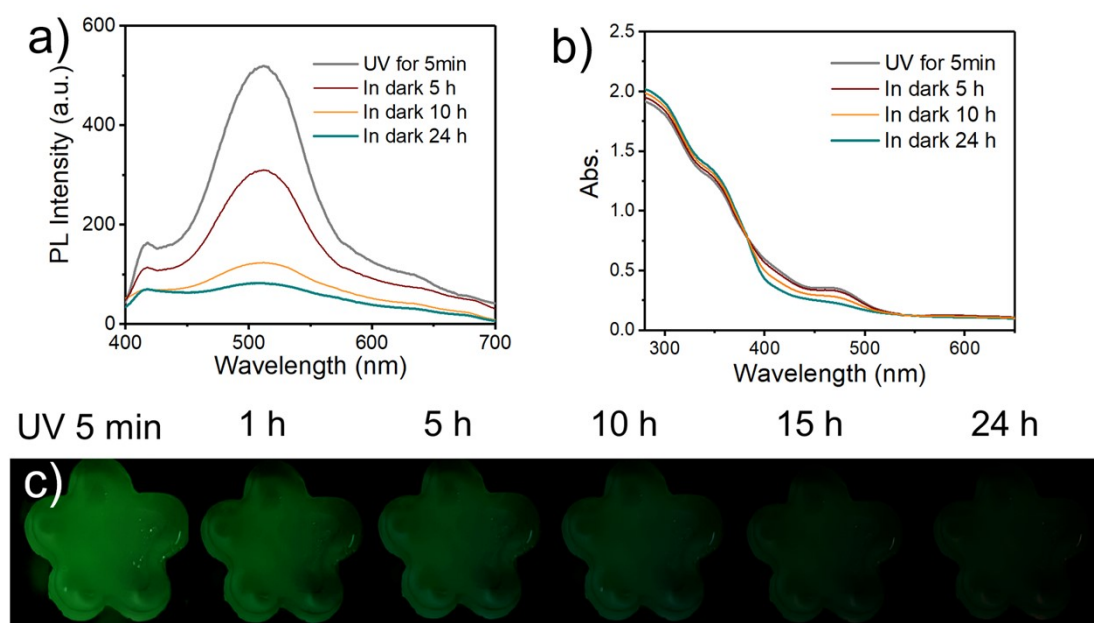

**Figure S11** PVA-HCPB-UV hydrogel in dark for different time. a) emission spectra of PVA-HCPB-UV after UV irradiation for 5 min and relax in dark for 24 h, b)Uv-vis absorption spectra of PVA-HCPB-UV after UV irradiation for 5 min and relax in dark for 24 h, c) Image of PVA-HCPB-UV after UV irradiation for 5 min and relax in dark for 24 h. These measurements were performed at 300 K with the amount of HCPB 0.8 mg.

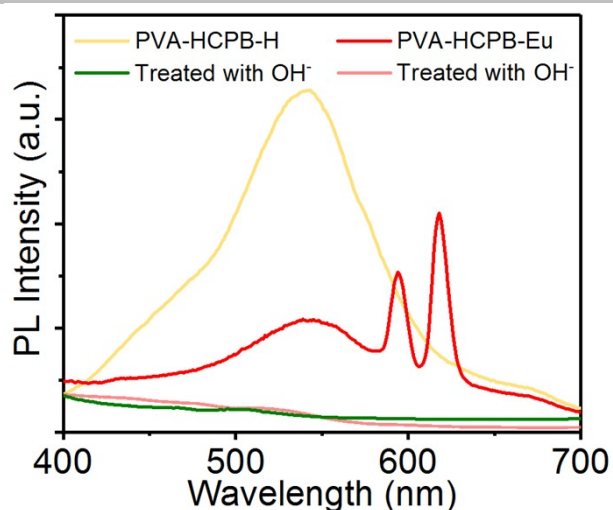

**Figure S12** The emission spectra of PVA-HCPB-H and PVA-HCPB-Eu hydrogel after treated with 1 ml ( $10^{-2}$  M)  $\text{NH}_3 \cdot \text{H}_2\text{O}$ . These measurements were performed at 300 K with the amount of HCPB 0.8 mg.

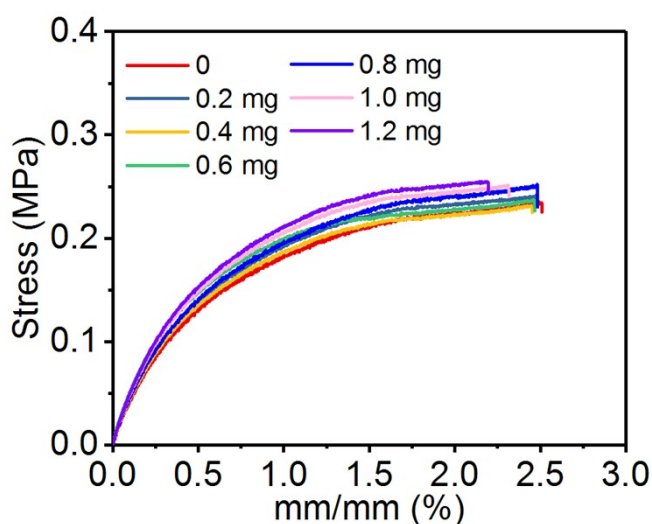

**Figure S13** Stress-strain curves of PVA-HCPB with different amount of HCPB. Sample width: 6 mm; Thickness: 1 mm; Gage length: 3 mm; Loading speed:  $5 \text{ mm min}^{-1}$ .

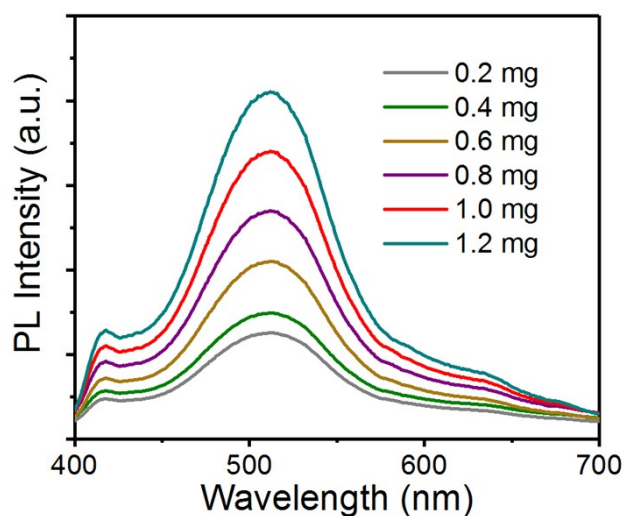

**Figure S14** The emission spectra of PVA-HCPB with different amount of HCPB after UV irradiation for 5 min.

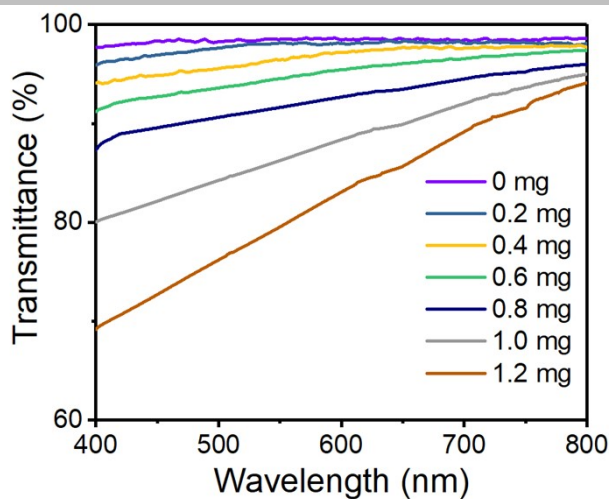

**Figure S15** UV-vis spectra (transmittance mode) of PVA-HCPB with different amount of HCPB.

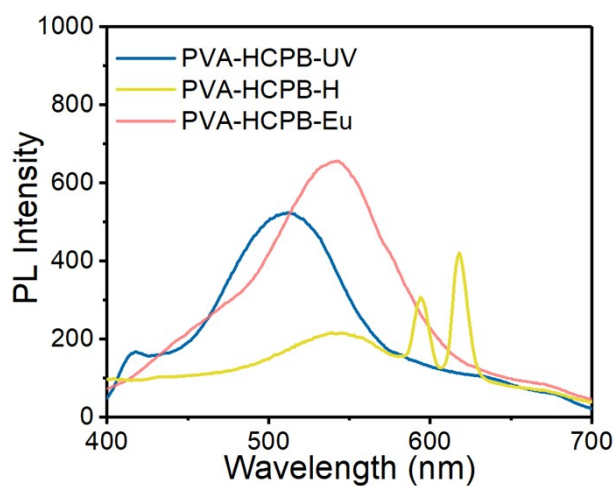

**Figure S16** The emission spectra of PVA-HCPB -UV hydrogel after treated with treated with 0.5 mL of  $10^{-2}$  M HCl and 0.8 mL of  $10^{-3}$  M  $\text{EuCl}_3$ .

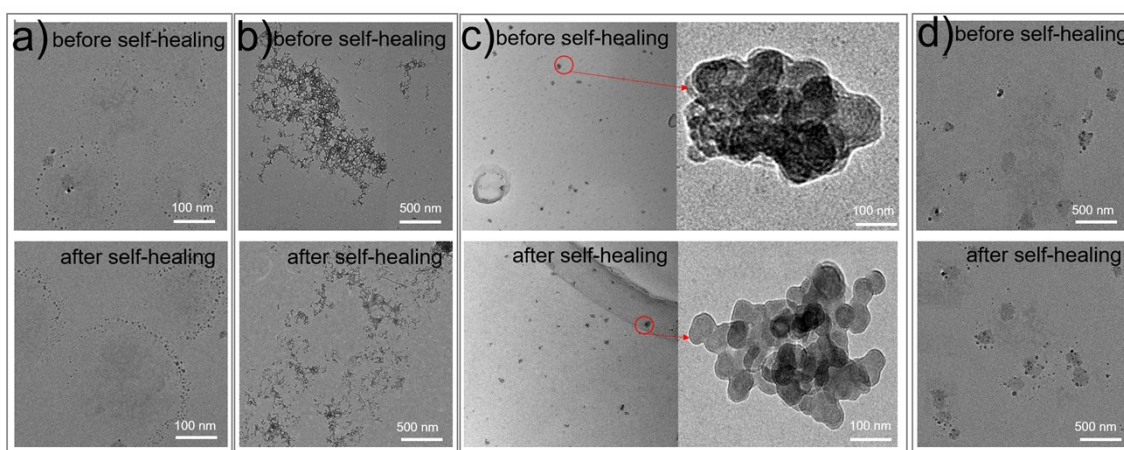

**Figure S17** TEM images of different hydrogel before and after self-healing. a) PVA-HCPB hydrogel, b) PVA-HCPB-Eu hydrogel, c) PVA-HCPB-Eu hydrogel, d) PVA-HCPB-UV hydrogel.



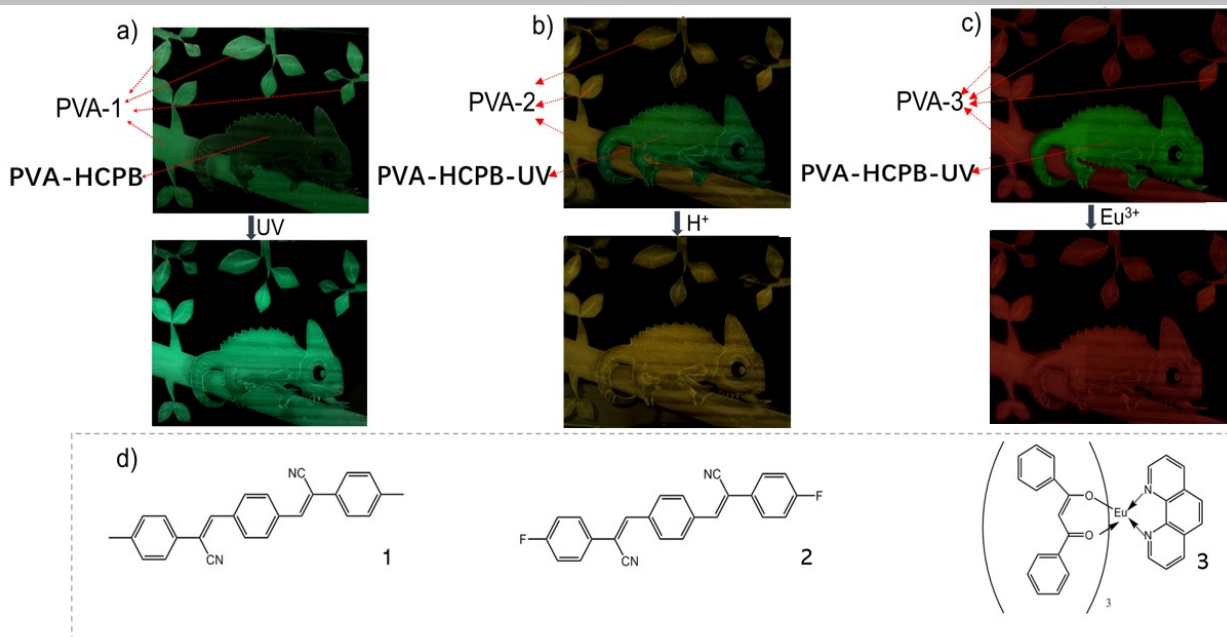

**Figure S18** Chameleon-shaped PVA-HCPB hydrogel switches luminescence under different stimuli.

a) Images showing the chameleon-shaped PVA-HCPB hydrogel that switches luminescence from colorless to green under UV. b) Chameleon-shaped PVA-HCPB hydrogel switches luminescence from green to yellow under H<sup>+</sup>. c) Chameleon-shaped PVA-HCPB hydrogel switches luminescence from green to red under Eu<sup>3+</sup>. d) Molecular structural of three compounds with different luminescent colors.

Fabrication process of these bioinspired chameleon-shaped hydrogel:

(1) PVA and compound 1, 2, and 3 can form green (PVA-1), yellow (PVA-2), and red (PVA-3) luminescence hydrogel, respectively. Fabrication process of these the surrounding environment hydrogels are as follow: The DMF solution of 1 (10 mg/mL, 0.1 mL) was added into 10 g of PVA solution. Then, the aqueous solution of Na<sub>2</sub>B<sub>4</sub>O<sub>7</sub> (0.1 M, 1 mL) was added in and green luminescence hydrogel formed. Finally, placed this hydrogel into the mold to form leaves and branches with green luminescence. Fabrication process of leaves and branches with yellow or red luminescence is similar to this by replacing compound 2 or 3 with 1.

(2) The chameleon-shaped hydrogel was made from PVA-HCPB and PVA-HCPB-UV hydrogel by placing PVA-HCPB hydrogel into chameleon-shaped mold, while the surrounding environment was made from PVA-1 hydrogel with green luminescence (a), PVA-2 hydrogel with yellow luminescence (b) and PVA-3 hydrogel with red luminescence (c).
